# Supplementary figures and images for: Subglandular-to-Subpectoral Conversion with Mastopexy: The Four-Step Approach
Source: PubMed Central journal article supplement — Plast Reconstr Surg. 2022 Jan 25;149(2):209–15. doi: 10.1097/PRS.0000000000008775 (PMC8781234; doi:10.1097/prs.0000000000008775), 2022-01-25

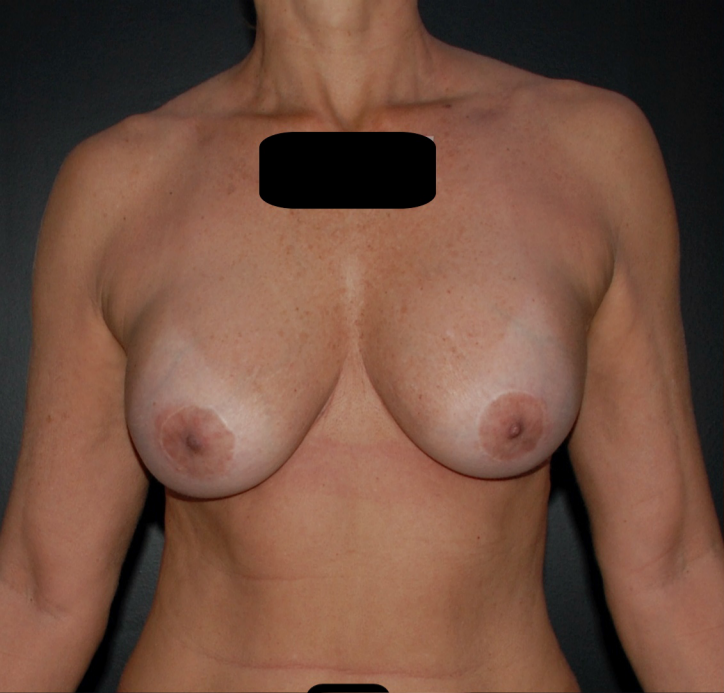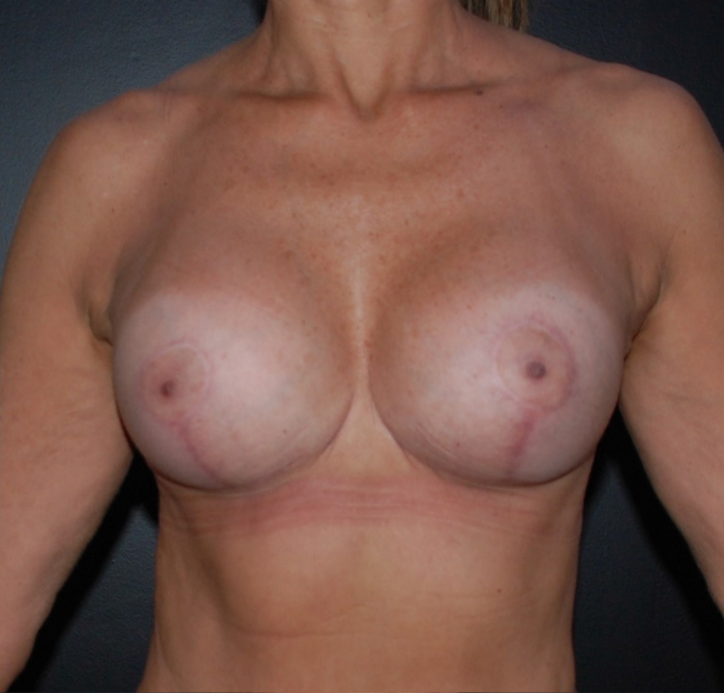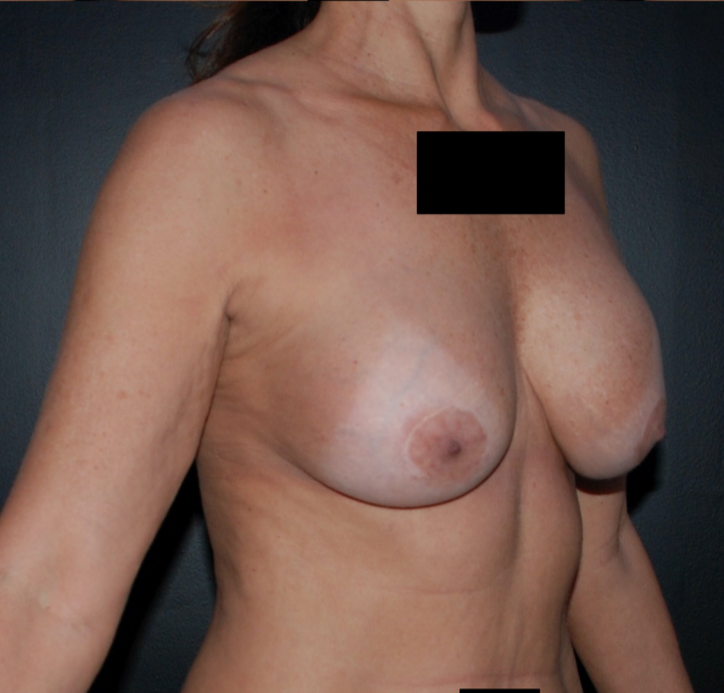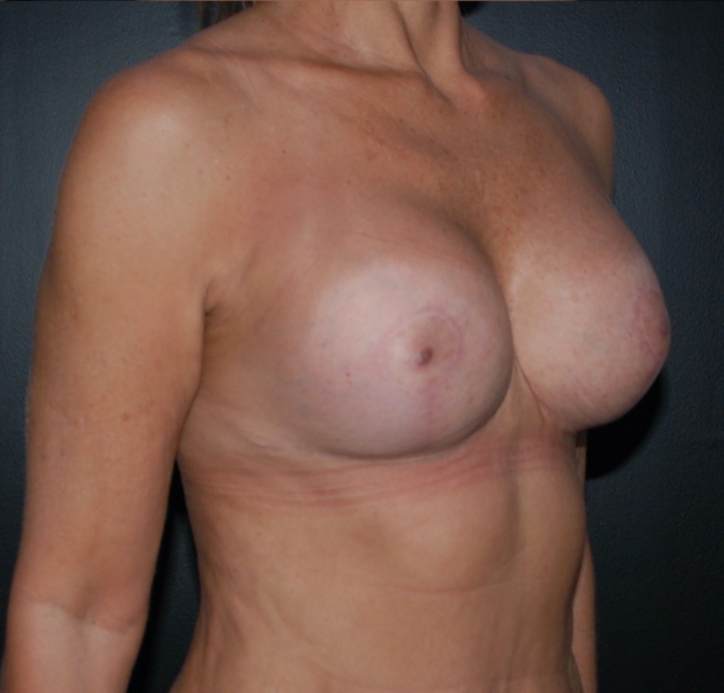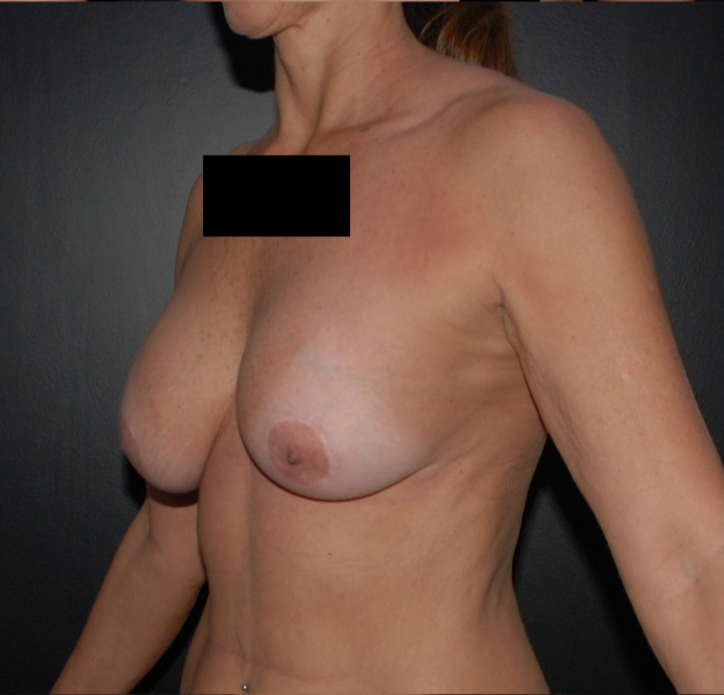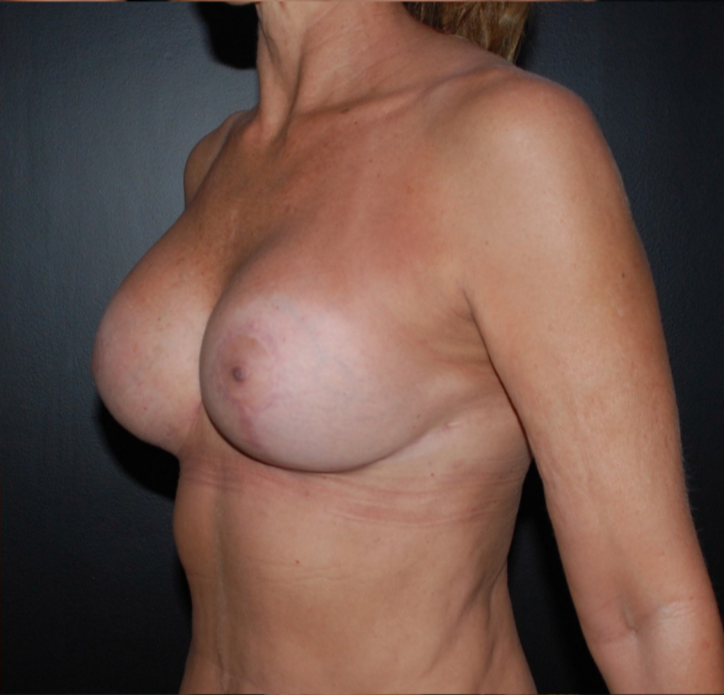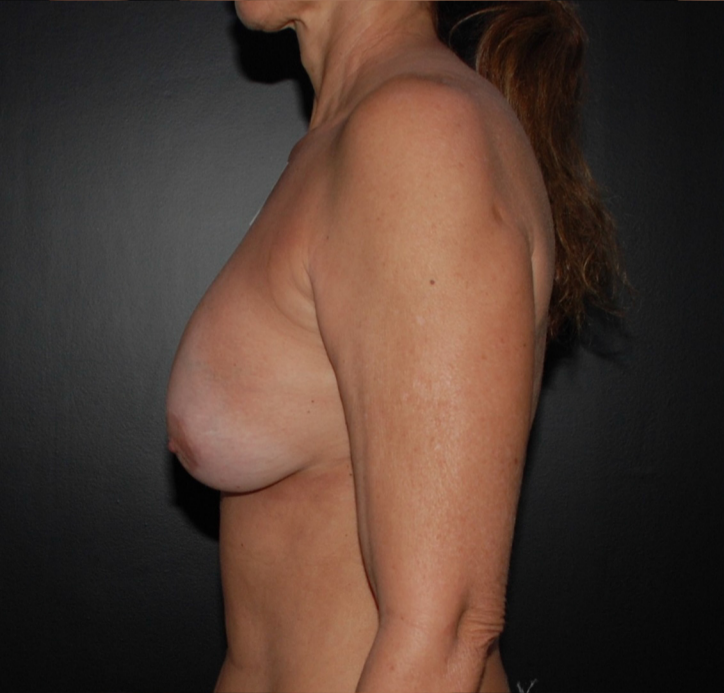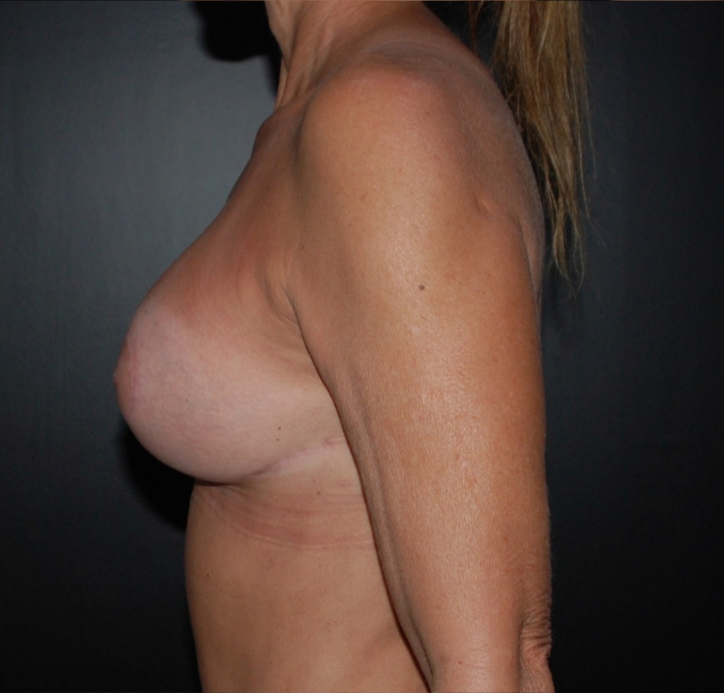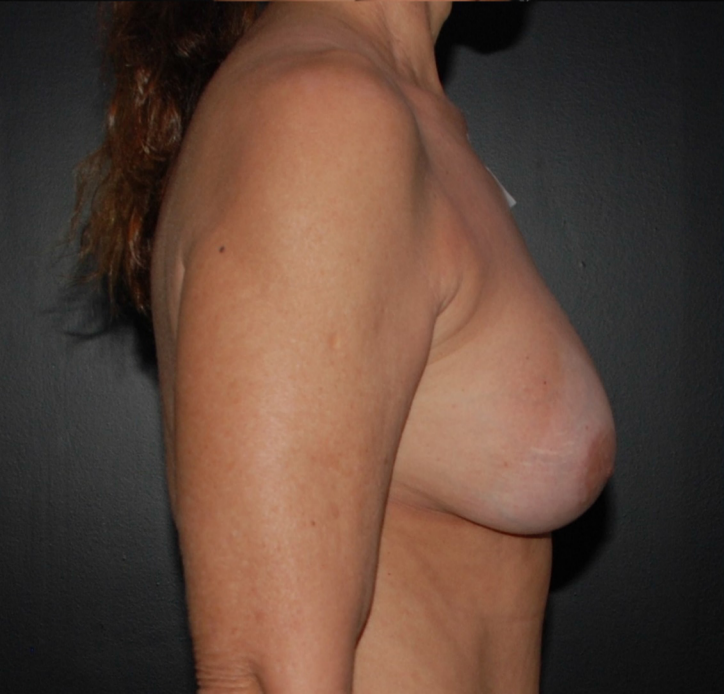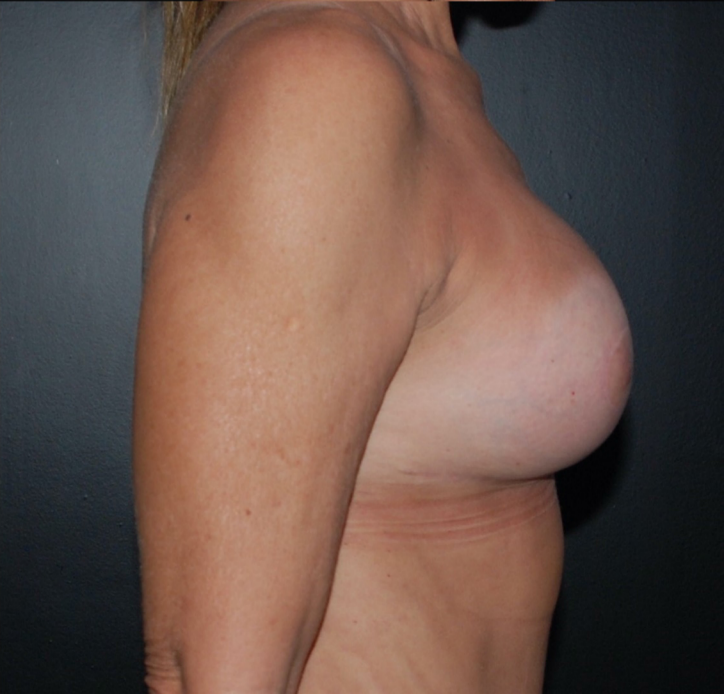

Supplement: prs-149-209e-s002.pdf [file prs-149-209e-s002.pdf]

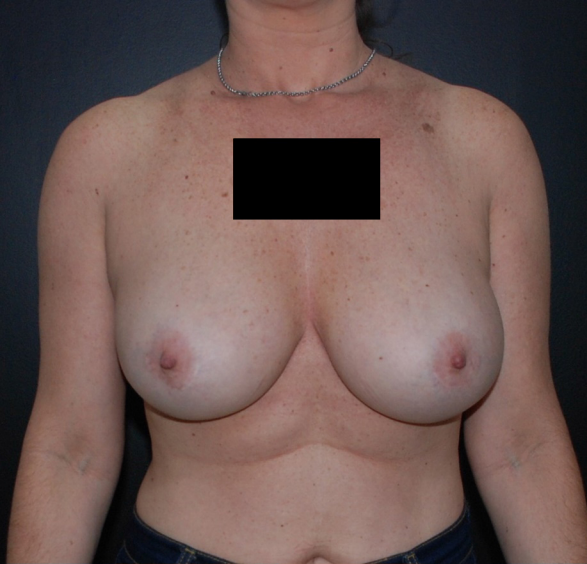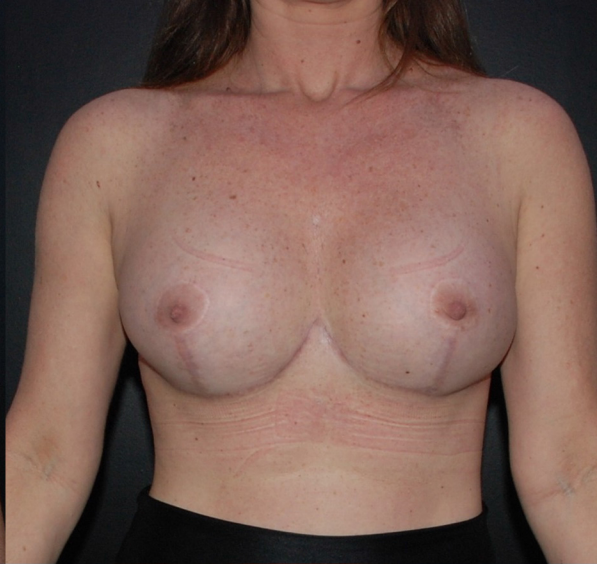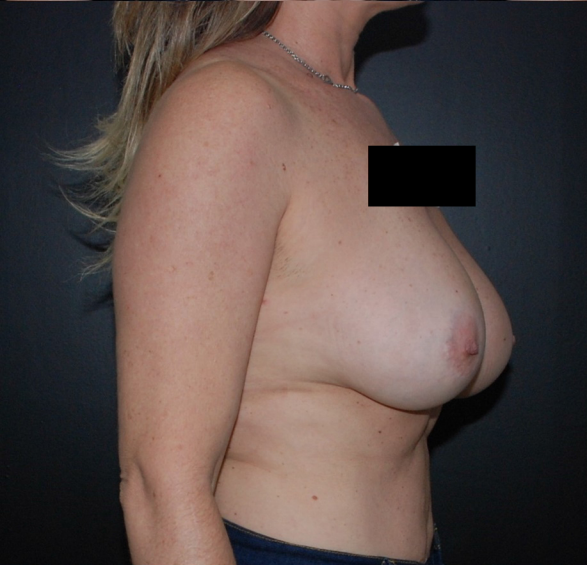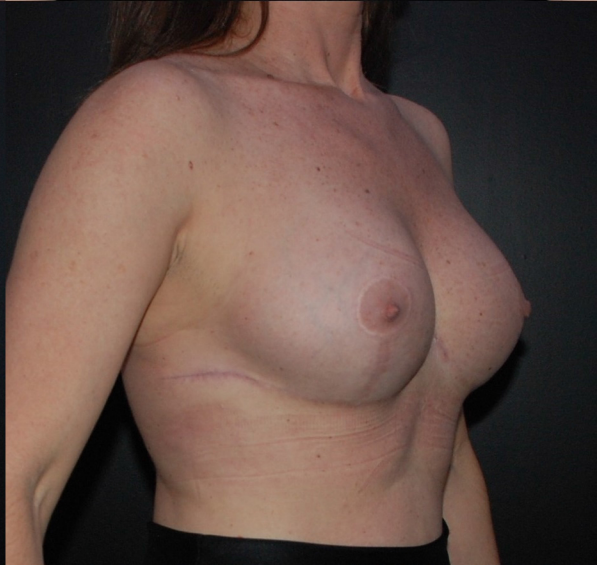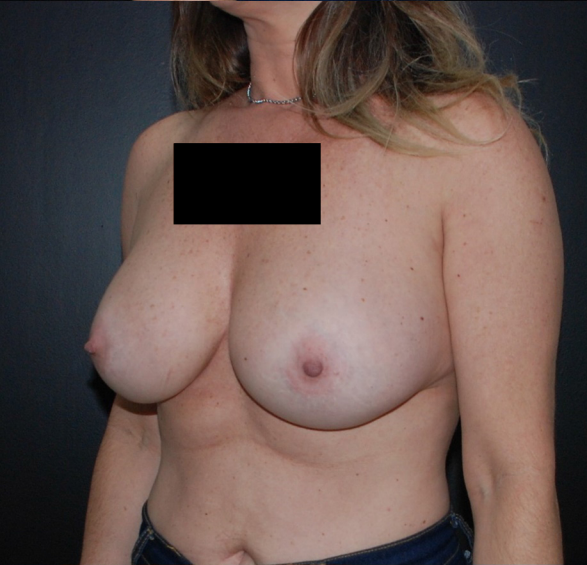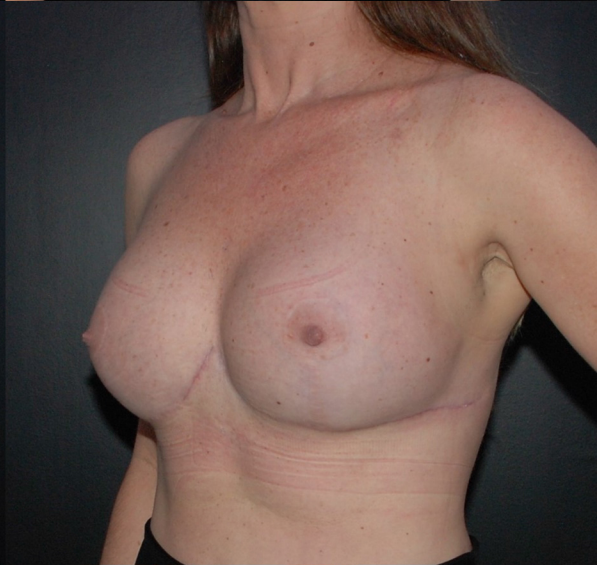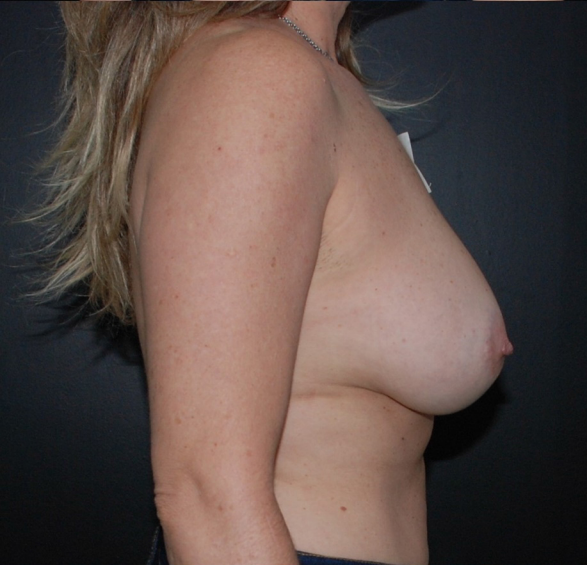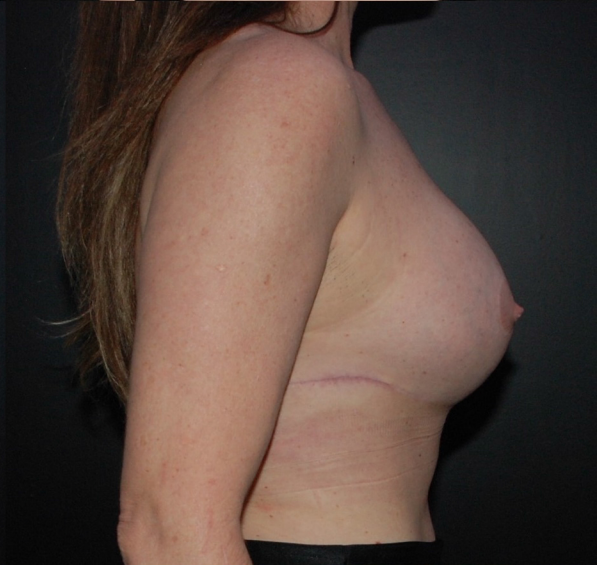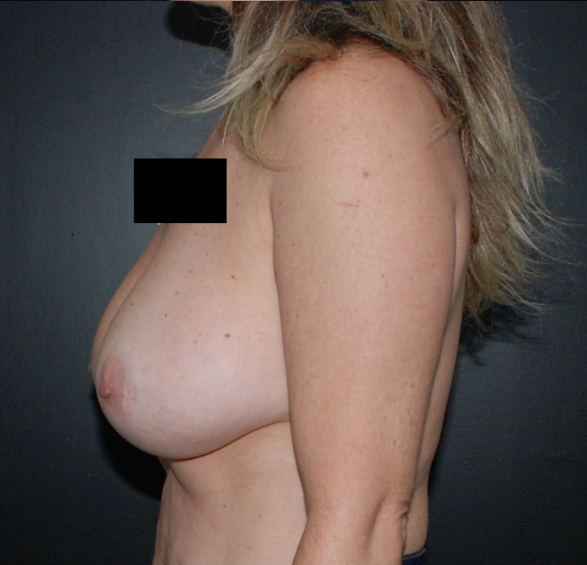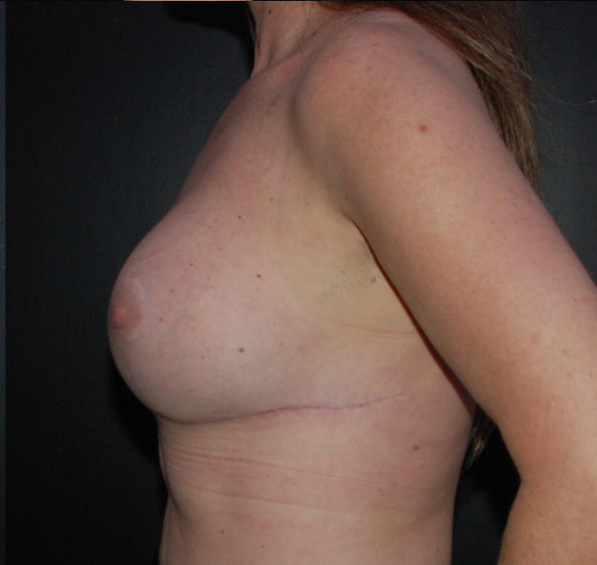

Supplement: prs-149-209e-s003.pdf [file prs-149-209e-s003.pdf]
